# Supplementary material for: Adipose Tissue Quantification Improves the Prognostic Value of GLIM Criteria in Advanced Gastric Cancer Patients
Source: MDPI journal article supplement (doi:10.3390/nu16050728), 2024-03-02
Supplement: s1 [file s1]

Table S1. Comparisons of adipose tissue index parameters according to age groups of enrolled patients.

| Adipose tissue index parameters                        | Age groups              |                         |                         | P-value |
|--------------------------------------------------------|-------------------------|-------------------------|-------------------------|---------|
|                                                        | <50 years               | 50–70 years             | >70 years               |         |
| Initial SAT index (cm <sup>2</sup> /m <sup>2</sup> )   | 52.1<br>(32.9–71.0)     | 43.6<br>(30.3–54.3)     | 45.7<br>(27.6–64.2)     | 0.025*  |
| Initial VAT index (cm <sup>2</sup> /m <sup>2</sup> )   | 40.7<br>(27.8–56.5)     | 43.6<br>(26.7–62.7)     | 48.7<br>(31.0–76.7)     | 0.255   |
| Follow-up SAT index (cm <sup>2</sup> /m <sup>2</sup> ) | 30.3<br>(21.9–46.1)     | 30.5<br>(20.1–42.6)     | 34.4<br>(22.5–50.1)     | 0.348   |
| Follow-up VAT index (cm <sup>2</sup> /m <sup>2</sup> ) | 13.0<br>(6.3–23.5)      | 20.8<br>(10.8–34.3)     | 26.9<br>(12.7–36.3)     | 0.002†  |
| ΔSAT index (%)                                         | -36.2<br>(-54.8– -11.2) | -29.1<br>(-44.8–0.1)    | -17.7<br>(-40.3–0.7)    | 0.015‡  |
| ΔVAT index (%)                                         | -57.6<br>(-75.2– -40.9) | -51.8<br>(-67.7– -30.1) | -48.7<br>(-61.7– -25.0) | 0.016‡  |

All values are expressed in median (interquartile range)

SAT, subcutaneous adipose tissue; VAT, visceral adipose tissue

\*On post-hoc analysis, patients with <50 years had significant higher values than those with 50–70 years (p<0.05)

†On post-hoc analysis, patients with 50–70 years and >70 years had significant higher values than those with <50 years (p<0.05)

‡On post-hoc analysis, patients with >70 years had significantly higher values than those with <50 years (p<0.05)
